# Supplementary material for: Presence of S100A9-positive inflammatory cells in cancer tissues correlates with an early stage cancer and a better prognosis in patients with gastric cancer
Source: PubMed Central journal article supplement (PMC3476982; doi:10.1186/1471-2407-12-316), 2012-07-28
Supplement: 1471-2407-12-316-S2.pdf [file 1471-2407-12-316-S2.pdf]

Table S1. Association of S100A8-positive inflammatory cell count in cancer tissues with clinicopathological parameters in gastric cancer patients.

| Factor                       | S100A8 negative<br>(positive cells <64) | S100A8 positive<br>(positive cells ≥64) | P value |
|------------------------------|-----------------------------------------|-----------------------------------------|---------|
| Gender (%)                   |                                         |                                         | 0.798   |
| Male                         | 45(72.60)                               | 47(74.60)                               |         |
| Female                       | 17(27.40)                               | 16(25.40)                               |         |
| Age (%)*                     |                                         |                                         | 0.000   |
| <50                          | 0(0.00)                                 | 39(61.90)                               |         |
| 50-59                        | 0(0.00)                                 | 24(38.10)                               |         |
| 60-69                        | 48(77.40)                               | 0(0.00)                                 |         |
| ≥70                          | 14(22.60)                               | 0(0.00)                                 |         |
| TNM stage (%)*               |                                         |                                         | 0.228   |
| I                            | 3(4.80)                                 | 9(14.30)                                |         |
| II                           | 13(21.00)                               | 8 (12.70)                               |         |
| III                          | 22(35.50)                               | 22(34.90)                               |         |
| IV                           | 24(38.70)                               | 24(38.10)                               |         |
| Tumor location (%)           |                                         |                                         | 0.871   |
| Cardia                       | 14(22.60)                               | 15(23.80)                               |         |
| Non-cardia                   | 48(77.40)                               | 48(76.20)                               |         |
| Depth of mural invasion (%)* |                                         |                                         | 0.903   |
| T1                           | 1(1.60)                                 | 2(3.20)                                 |         |
| T2                           | 10(16.10)                               | 12(19.00)                               |         |
| T3                           | 37(59.70)                               | 35(55.60)                               |         |
| T4                           | 14(22.60)                               | 14(22.20)                               |         |
| Lymph node metastasis (%)    |                                         |                                         | 0.162   |
| N0                           | 10(16.10)                               | 18(28.60)                               |         |
| N1                           | 23(37.10)                               | 18(28.60)                               |         |
| N2                           | 16(25.80)                               | 20(31.70)                               |         |
| N3                           | 13(21.00)                               | 7(11.10)                                |         |
| Distant metastasis (%)       |                                         |                                         | 0.088   |
| Negative                     | 56(90.30)                               | 50(79.40)                               |         |
| Positive                     | 6(9.70)                                 | 13(20.60)                               |         |
| Vascular invasion (%)        |                                         |                                         | 0.973   |
| Negative                     | 25(41.00)                               | 24(40.70)                               |         |
| Positive                     | 36(59.00)                               | 35(59.30)                               |         |
| Differentiation (%)*         |                                         |                                         | 0.333   |
| Well                         | 1(1.60)                                 | 5(7.90)                                 |         |
| Poorly+moderately            | 53(85.50)                               | 50(79.40)                               |         |
| Other types                  | 6(9.70)                                 | 7(11.10)                                |         |
| Not determined               | 2(3.20)                                 | 1(1.60)                                 |         |

\* Fisher's exact test
