# Supplementary material for: Presence of S100A9-positive inflammatory cells in cancer tissues correlates with an early stage cancer and a better prognosis in patients with gastric cancer
Source: PubMed Central journal article supplement (PMC3476982; doi:10.1186/1471-2407-12-316), 2012-07-28

Figure S2

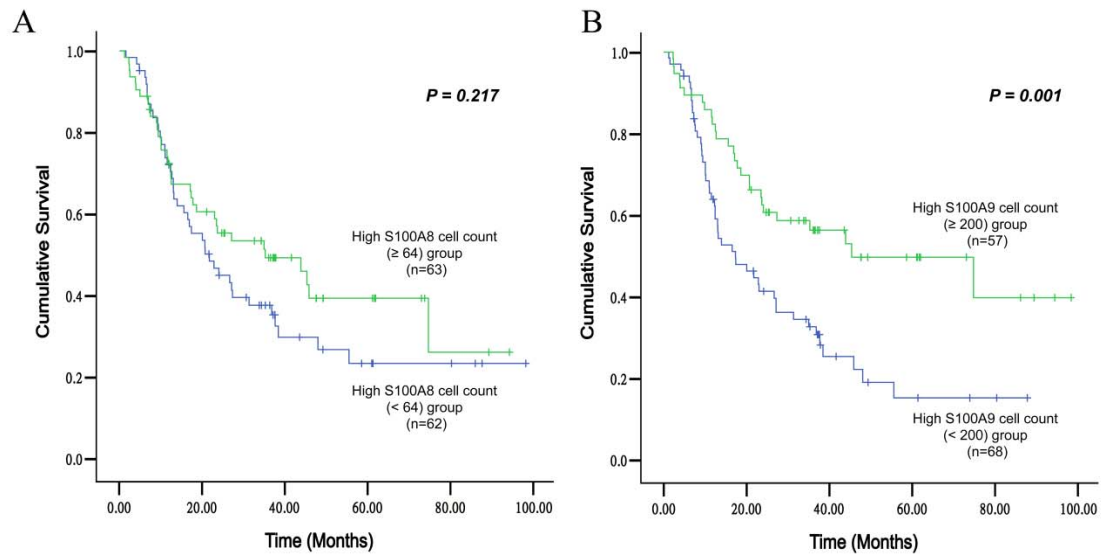

Supplement: 1471-2407-12-316-S3.pdf [file 1471-2407-12-316-S3.pdf]
